# Supplementary material for: Dysfunction of the Brown Adipose Organ in HFD-Obese Rats and Effect of Tart Cherry Supplementation
Source: MDPI journal article supplement (doi:10.3390/antiox13040388), 2024-03-23
Supplement: s1 [file s1]

**Supplementary Table S1.**

General and blood parameters and adipose tissue weight at the end of supplementation.

|                                                 | CHOW           | DIO             | DS               | DJS             |
|-------------------------------------------------|----------------|-----------------|------------------|-----------------|
| <b>General parameters</b>                       |                |                 |                  |                 |
| Body Weight (g)                                 | 557.0 ± 10.7   | 682.8 ± 17**    | 683.1 ± 29.7**   | 689 ± 20.8**    |
| Food Intake (kcal)                              | 75.7 ± 2.3     | 93.0 ± 3.3*     | 91.6 ± 7*        | 88.0 ± 2.6*     |
| <b>Adipose tissue weight</b>                    |                |                 |                  |                 |
| Perigonadal white adipose tissue weight (g)     | 9.5 ± 1.1      | 19.6 ± 1.4*     | 16.9 ± 1.1*      | 20.4 ± 2.5*     |
| Retroperitoneal white adipose tissue weight (g) | 8.8 ± 0.9      | 29.4 ± 3.8*     | 25.1 ± 11.8*     | 29.4 ± 3.1*     |
| Interscapular brown adipose tissue weight (g)   | 0.53 ± 0.07    | 0.92 ± 0.09*    | 0.85 ± 0.08*     | 0.92 ± 0.09*    |
| <b>Blood parameters</b>                         |                |                 |                  |                 |
| Systolic blood pressure (mmHg)                  | 110.9 ± 6.1    | 140.3 ± 8.1*    | 111.4 ± 5.5#     | 107.6 ± 6.01#   |
| Glycemia (mg/dL)                                | 91.6 ± 5.1     | 126.8 ± 6.1*    | 105.7 ± 3.6#     | 111.3 ± 2.4*#   |
| Insulin (µg/L)                                  | 0.73 ± 0.05    | 1.06 ± 0.05*    | 1.01 ± 0.06*     | 1.03 ± 0.06*    |
| Cholesterol (mg/dL)                             | 76.1 ± 3.3     | 75.6 ± 4.1      | 69.8 ± 5.6       | 77.6 ± 4.4      |
| Triglycerides (mg/dL)                           | 76.6 ± 10.4    | 84.3 ± 13.9     | 42.9 ± 3.6*#     | 49.8 ± 1.9*#    |
| Leptin concentration (pg/mL)                    | 3449.7 ± 165.6 | 9159.2 ± 110.1* | 8362.6 ± 184.5*# | 7572.0 ± 65.9*# |

CHOW: rats fed with standard diet; DIO: rats fed with high-fat diet; DS: DIO rats supplemented with tart cherry seeds; DJS: DS rats supplemented with tart cherry juice. Data are the means ± S.E.M. \*  $p < 0.05$ , \*\*  $p < 0.01$  vs. CHOW rats; #  $p < 0.05$  vs. DIO rats.

Modified from previous articles:

- Micioni Di Bonaventura, M.V.; Martinelli, I.; Moruzzi, M.; Micioni Di Bonaventura, E.; Giusepponi, M.E.; Polidori, C.; Lupidi, G.; Tayebati, S.K.; Amenta, F.; Cifani, C.; Tomassoni, D. Brain alterations in high fat diet induced obesity: effects of tart cherry seeds and juice. *Nutrients*. 2020, 12, 623. doi: 10.3390/nu12030623
- Moruzzi, M.; Klötting, N.; Blüher, M.; Martinelli, I.; Tayebati, S. K.; Gabrielli, M. G.; Roy, P.; Micioni Di Bonaventura, M. V.; Cifani, C.; Lupidi, G.; Amenta, F.; Tomassoni, D. Tart Cherry Juice and Seeds Affect Pro-Inflammatory Markers in Visceral Adipose Tissue of High-Fat Diet Obese Rats. *Molecules* 2021, 26, 1403. doi.org/10.3390/molecules26051403.
